# Supplementary material for: Capturing patients’ experiences to change Parkinson’s disease care delivery: a multicenter study
Source: Springer Nature journal article supplement (doi:10.1007/s00415-015-7877-2), 2015-08-20
Supplement: MOESM1 [file 8460466]

# Patient-Centered Questionnaire for Parkinson's Disease (PCQ-PD)

Questionnaire on patient experiences with care  
provided to people with Parkinson's disease

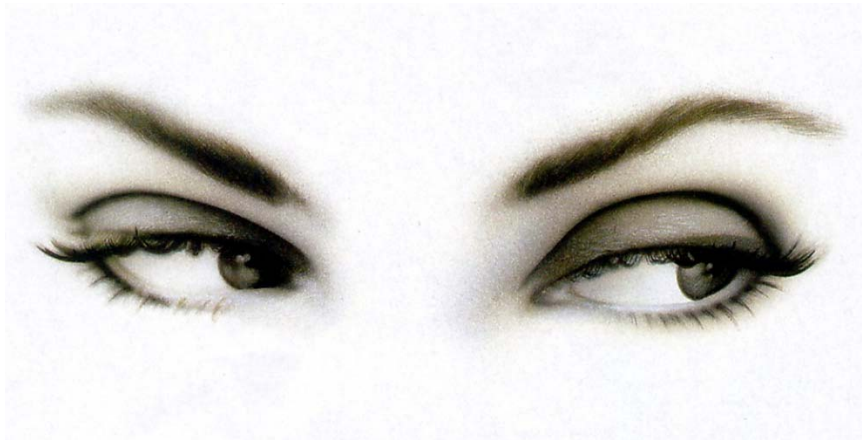

*Quality of care through patients' eyes*

This questionnaire is developed by the National Parkinson Foundation, The Radboud University Nijmegen Medical Centre (The Netherlands) and the UF Center for Movement Disorders & Neurorestoration

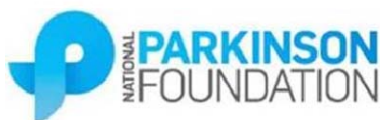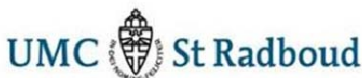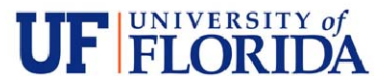

## INFORMATION ABOUT THE QUESTIONNAIRE

This questionnaire **focuses on your experiences with care** regarding Parkinson's disease **during the past year**. Your answers will help to improve healthcare to what's important to you as a patient.

We appreciate your time in completing this questionnaire. Participation in this study is **voluntary**. All information is **confidential**. Your healthcare providers will not be able to see your answers.

### Instructions for filling out the questionnaire

Please answer the questions by marking them with an *x* in the square to the left of the best answer. Your answers will be analyzed by a computer. An *x* outside of these squares will not be detected!

= correct

*x* = incorrect

If you want to change your answer, put brackets around that choice and put an *x* in the square of your final choice:

() = the answer you do not want to choose

= your final answer

It is important that the questions are completed by the person named on the cover letter, if needed, you can ask your caregiver or a family member for assistance. It will take you approx. **20 minutes** to complete the questionnaire. **Completing part C is optional.**

There are no "right" or "wrong" answers. Your views and experiences are what matter. After you have completed the questionnaire, it can be returned using the enclosed reply envelope (no stamp required). For questions or comments, please call [*Name*], telephone number [*number*] or send an e-mail to [*e-mail address*].

## Part A. Background questions

The following questions are about your gender, age and health status.

1. What is your year of birth?

2. Are you a male or a female?

- Male  
 Female

3. What is your neurological diagnosis?

- I have Parkinson's disease  
 I have a Parkinsonism (e.g. MSA or PSP)  
 I do not know  
 I have another diagnosis:

4. In what year did you perceive the first Parkinson's disease symptoms?

5. In what year have you been diagnosed with Parkinson's disease?

6. What is the highest level of education you completed?

- Less than high school graduate  
 High school graduate or equivalent  
 Attended a college, but no degree  
 Completed a technical or community college (e.g. associate's degree)  
 College or university degree or higher

7. What is your living situation?

- At home  
 Skilled care facility  
 Other

8. Do you have a regular care partner?

- No  
 Yes, spouse/ partner  
 yes, other relative  
 yes, paid caregiver  
 Yes, other

9. Did you visit one of the following health professionals related to Parkinson's disease during the past year?

*You may mark more than one square!*

- Neurologist  
 Primary Care Physician  
 Physical therapist  
 Occupational therapist  
 Speech therapist  
 Psychosocial caregiver/ social worker  
 other, namely;

10. Overall, how do you rate the quality of healthcare for your Parkinson's disease that you have received in the past year?

- Excellent  
 Very good  
 Good  
 Fair  
 Poor

**11. In general, how would you describe your own physical health?**

- Excellent
- Very good
- Good
- Fair
- Poor

**12. In general, how would you describe your own mental health?**

- Excellent
- Very good
- Good
- Fair
- Poor

**13. Which statement describes your current disease stage best?**

*Please mark one square only*

- Parkinson symptoms only affect one side of my body.
- Parkinson symptoms mildly affect both sides of my body but I have no problems with my balance.
- There are mild to moderate signs of Parkinson's disease on both sides of my body and I have problems with my balance. I am physically independent.
- I am severely limited. However, I am still able to walk or stand without assistance.
- I am bound to a wheelchair or bedridden, unless I receive assistance.

**14. Were you born in the United States, Canada or somewhere else?**

- Yes, born in the US
- Yes, born in Canada
- No, born somewhere else

**15. What is your primary language that you speak at home?**

- English
- Spanish
- French
- Some other language

**16. Are you of Hispanic or Latin origin or descent?**

- Yes, Hispanic or Latin
- No, not Hispanic or Latin

**17. Do you consider yourself...?**

- White
- Black or African-American
- Asian
- Native Hawaiian or other Pacific Islander
- American Indian or Alaska Native
- Other

**18. Were you covered with a health plan or health insurance during the past year?**

- Covered
- Not covered
- I do not know

**19. If covered, in which manner?**

*You may mark more than one square*

- Health insurance through your or someone else's employer or union
- Medicare, a government plan that pays health care bills for people aged 65 or older and for some disabled people
- Medicaid or any other state medical assistance plan
- Health insurance that you purchased directly
- Health insurance from some other source
- I do not know

## **Part B. Your experiences with healthcare**

The following questions focus on your experiences with healthcare during the past year. Certain questions may not apply to you, or you may not have experienced certain care aspects. Please answer these question with “not applicable”.

### **Part B1: Providing information**

While answering part B1, it is not important how you have obtained the information; face-to-face, a brochure, internet, your clinic’s website, from health professionals or peers.

#### **1. Do you know what a regional or national Parkinson’s disease patient organization can do for you?**

- No, not at all
- Yes, to some extent
- Yes, to a moderate extent
- Yes, to a great extent
- No need/ not applicable in the past year

#### **2. Do you know where to find adaptive equipment, home care and facilities for Parkinson’s disease?**

- No, not at all
- Yes, to some extent
- Yes, to a moderate extent
- Yes, to a great extent
- No need/ not applicable in the past year

#### **3. Do you know where to find reliable information about Parkinson's disease?**

- No, not at all
- Yes, to some extent
- Yes, to a moderate extent
- Yes, to a great extent
- No need/ not applicable in the past year

#### **4. Do you know about the possibilities of peer support (groups)?**

- No, not at all
- Yes, to some extent
- Yes, to a moderate extent
- Yes, to a great extent
- No need/ not applicable in the past year

#### **5. Have you been informed about medication use and possible side effects?**

- No, not at all
- Yes, to some extent
- Yes, to a moderate extent
- Yes, to a great extent
- No need/ not applicable in the past year

#### **6. Have you been informed whether or not your Parkinson medication and/ or treatment is covered by your health insurance?**

- No, not at all
- Yes, to some extent
- Yes, to a moderate extent
- Yes, to a great extent
- No need/ not applicable in the past year

#### **7. Did one of your health professionals contact you after you started a new medication regimen? *e.g. to ask about your response or possible side effects***

- No, not at all
- Yes, to some extent
- Yes, to a moderate extent
- Yes, to a great extent
- No need/ not applicable in the past year

**8. Do you know about the possibilities of alternative health therapies as an additional treatment to your disease?**

*e.g. acupuncture or massage*

- No, not at all
- Yes, to some extent
- Yes, to a moderate extent
- Yes, to a great extent
- No need/ not applicable in the past year

**9. Do you know about advanced treatment options?**

*e.g. deep brain stimulation surgery, Apokyn or a duodopa pump*

- No, not at all
- Yes, to some extent
- Yes, to a moderate extent
- Yes, to a great extent
- No need/ not applicable in the past year

**10. Do you know about Parkinson's disease and the ability to drive a car?**

*e.g. the influence of medication on your driving skills or changes in vision*

- No, not at all
- Yes, to some extent
- Yes, to a moderate extent
- Yes, to a great extent
- No need/ not applicable in the past year

**11. Do you know how to find health professionals who are specialized in Parkinson's disease?**

- No, not at all
- Yes, to some extent
- Yes, to a moderate extent
- Yes, to a great extent
- No need/ not applicable in the past year

**12. Do you know about the treatment options for Parkinson's disease provided by different health professionals?**

*Treatment by a physical therapist (e.g. prevent loss of mobility), occupational therapist (e.g. assistance in everyday activities), speech therapist (communication and swallowing).*

- No, not at all
- Yes, to some extent
- Yes, to a moderate extent
- Yes, to a great extent
- No need/ not applicable in the past year

**Part B2:**

**Communication and collaboration among your health professionals in the past year**

**13. Did you have one health professional with whom you could make the most important health decisions?**

- No
- Yes
- I don't know

**14. Was someone made responsible for the coordination of your care?**

*'Someone' can be a physician, physician assistant, nurse practitioner, but also yourself, your partner or a family member.*

- No
- Yes
- I don't know

**15. Were all your health professionals aware of each others' involvement in your treatment?**

- No, not at all
- Yes, to some extent
- Yes, to a moderate extent
- Yes, to a great extent
- I don't know

**16. Did your health professionals make mutual agreements about your treatment?**

- No, not at all
- Yes, to some extent
- Yes, to a moderate extent
- Yes, to a great extent
- I don't know

**17. Did you get conflicting information from your health professionals?**

- No, not at all
- Yes, to some extent
- Yes, to a moderate extent
- Yes, to a great extent

**18. Were you informed about what your health professionals discussed with each other regarding your treatment?**

- No, not at all
- Yes, to some extent
- Yes, to a moderate extent
- Yes, to a great extent

**19. If you requested a second opinion in the past year, did your physician cooperate?**

- No, not at all
- Yes, to some extent
- Yes, to a moderate extent
- Yes, to a great extent
- Not applicable to the past year

**20. In your opinion, did your Primary Care Physician/ family doctor refer you to the neurologist in a timely manner?**

- No
- Yes
- Not applicable to the past year

**21. Did your neurologist and the physician assistant/ nurse practitioner collaborate?**

- No, not at all
- Yes, to some extent
- Yes, to a moderate extent
- Yes, to a great extent
- Not applicable to the past year

**22. If several physicians were involved in your treatment simultaneously, did these physicians collaborate?**

- No, not at all
- Yes, to some extent
- Yes, to a moderate extent
- Yes, to a great extent
- Not applicable to the past year
- I do not know

**Part B3:  
Accessibility of your health professionals in  
the past year**

**23. In general, was the length of time you had to wait before you could visit your health professionals a problem for you?**

- Not a problem
- Not much of a problem
- A moderate problem
- A serious problem

**24. In general, was the time spent in the waiting room a problem for you?**

- Not a problem
- Not much of a problem
- A moderate problem
- A serious problem

**25. Did you have one person assigned to you, whom you could contact for questions, problems or a complaint?**

- No
- Yes
- I do not know/ I haven't tried

**26. Did you have e-mail access to your health professionals?**

- No
- Yes
- I do not know/ I haven't tried

**27. Did you have telephone access to your health professionals?**

- No
- Yes
- I do not know/ I haven't tried

**28. In general, did your health professionals answered your questions in a timely manner?**

- No, not at all
- Yes, to some extent
- Yes, to a moderate extent
- Yes, to a great extent
- I do not know/ I haven't tried

**Part B4:  
Empathy and expertise of your health  
professionals in the past year**

**29. Did your health professionals listen carefully to you?**

- No, not at all
- Yes, to some extent
- Yes, to a moderate extent
- Yes, to a great extent

**30. Did your health professionals take enough time with you?**

- No, not at all
- Yes, to some extent
- Yes, to a moderate extent
- Yes, to a great extent

**31. Did your health professionals explain things clearly?**

- No, not at all
- Yes, to some extent
- Yes, to a moderate extent
- Yes, to a great extent



**32. Did your health professionals seem competent to you regarding the treatment of Parkinson's disease?**

- No, not at all
- Yes, to some extent
- Yes, to a moderate extent
- Yes, to a great extent

**Part B5: Patient involvement**

The following questions focus on the way your health professionals empowered you to make your own decisions in the past year.

**33. Did you have access to your own medical record during the past year?**

- No
- Yes
- I do not know/ I haven't tried

**34. Did you have the opportunity to authorize who had access to your medical record during the past year?**

- No
- Yes
- I do not know/ I haven't tried

**35. Did you have the opportunity to choose the health professionals by whom you wish to be treated? e.g. being able to see the physician you requested to see**

- No
- Yes
- I do not know/ I haven't tried

**36. Did you have the opportunity to schedule appointments with your health professionals at a time you preferred?**

- No, not at all
- Yes, to some extent
- Yes, to a moderate extent
- Yes, to a great extent
- I do not know

**37. Did your health professionals adapt the treatment to your personal situation and preferences?**

- No, not at all
- Yes, to some extent
- Yes, to a moderate extent
- Yes, to a great extent

**38. Were you encouraged to participate in decisions about your treatment with your health professionals?**

- No, not at all
- Yes, to some extent
- Yes, to a moderate extent
- Yes, to a great extent

**Part B6 Emotional support by your health professionals**

The following questions are about your caregiver and the opportunity to bring up issues that relate to the impact of Parkinson's disease on your personal situation and daily life in the past year.

**39. Did your health professionals pay attention to your caregiver?**

- No, not at all
- Yes, to some extent
- Yes, to a moderate extent
- Yes, to a great extent
- Not applicable to my situation

**40. Did your health professionals actively involve your caregiver in decisions about your treatment?**

- No, not at all
- Yes, to some extent
- Yes, to a moderate extent
- Yes, to a great extent
- Not applicable to my situation

**41. If you were diagnosed with Parkinson's disease in the past year, were you supported by your health professionals directly after the diagnosis was first communicated to you?**

- No, not at all
- Yes, to some extent
- Yes, to a moderate extent
- Yes, to a great extent
- Not applicable to the past year

**42. Were you supported by your health professionals in coping with the consequences of Parkinson's disease?**

*e.g. acceptance of disease progression*

- No, not at all
- Yes, to some extent
- Yes, to a moderate extent
- Yes, to a great extent
- I chose not to disclose to physician or staff
- Not applicable to the past year

**43. Were you supported by your health professionals if you had to deal with personal relationship changes due to Parkinson's disease?**

- No, not at all
- Yes, to some extent
- Yes, to a moderate extent
- Yes, to a great extent
- I chose not to disclose to physician or staff
- Not applicable to the past year

**44. Were you supported by your health professionals if you had problems related to your job due to Parkinson's disease?**

*e.g. maintaining your job/ coping with income loss.*

- No, not at all
- Yes, to some extent
- Yes, to a moderate extent
- Yes, to a great extent
- I chose not to disclose to physician or staff
- Not applicable to the past year

### Part C. Your priorities in healthcare

What is most important to you regarding your treatment? **Part C is optional!** However, we appreciate your time if you are willing to answer the questions by marking them with an x in the box that best matches your opinion.

|    | How important is it that...                                                                                      | Not important            | Fairly important         | Important                | Extremely important      |
|----|------------------------------------------------------------------------------------------------------------------|--------------------------|--------------------------|--------------------------|--------------------------|
| 1  | You know what a regional or national patient organization can do for you?                                        | <input type="checkbox"/> | <input type="checkbox"/> | <input type="checkbox"/> | <input type="checkbox"/> |
| 2  | You know where to find adaptive equipment, home care and facilities for Parkinson's disease?                     | <input type="checkbox"/> | <input type="checkbox"/> | <input type="checkbox"/> | <input type="checkbox"/> |
| 3  | You know where to find reliable information about Parkinson's disease?                                           | <input type="checkbox"/> | <input type="checkbox"/> | <input type="checkbox"/> | <input type="checkbox"/> |
| 4  | You know about the possibilities of peer support (groups)?                                                       | <input type="checkbox"/> | <input type="checkbox"/> | <input type="checkbox"/> | <input type="checkbox"/> |
| 5  | You are informed about medication use and possible side effects?                                                 | <input type="checkbox"/> | <input type="checkbox"/> | <input type="checkbox"/> | <input type="checkbox"/> |
| 6  | One of your health professionals contact you after you started with a new medication regimen?                    | <input type="checkbox"/> | <input type="checkbox"/> | <input type="checkbox"/> | <input type="checkbox"/> |
| 7  | You are informed whether or not your Parkinson medication and/ or treatment is covered by your health insurance? | <input type="checkbox"/> | <input type="checkbox"/> | <input type="checkbox"/> | <input type="checkbox"/> |
| 8  | You know about the possibilities of alternative health therapies as an additional treatment to your disease?     | <input type="checkbox"/> | <input type="checkbox"/> | <input type="checkbox"/> | <input type="checkbox"/> |
| 9  | You know about advanced treatment options?                                                                       | <input type="checkbox"/> | <input type="checkbox"/> | <input type="checkbox"/> | <input type="checkbox"/> |
| 10 | You know about PD and the ability to drive a car?                                                                | <input type="checkbox"/> | <input type="checkbox"/> | <input type="checkbox"/> | <input type="checkbox"/> |
| 11 | You know about treatment options for PD provided by different health professionals?                              | <input type="checkbox"/> | <input type="checkbox"/> | <input type="checkbox"/> | <input type="checkbox"/> |
| 12 | You know how to find health professionals with specific expertise in Parkinson's disease?                        | <input type="checkbox"/> | <input type="checkbox"/> | <input type="checkbox"/> | <input type="checkbox"/> |
| 13 | You have one health professional with whom you can make the most important decisions?                            | <input type="checkbox"/> | <input type="checkbox"/> | <input type="checkbox"/> | <input type="checkbox"/> |
| 14 | Someone is made responsible for the coordination of your care?                                                   | <input type="checkbox"/> | <input type="checkbox"/> | <input type="checkbox"/> | <input type="checkbox"/> |
| 15 | Your health professionals are aware of each others' involvement in your treatment?                               | <input type="checkbox"/> | <input type="checkbox"/> | <input type="checkbox"/> | <input type="checkbox"/> |
| 16 | Your health professionals make mutual agreements about your treatment?                                           | <input type="checkbox"/> | <input type="checkbox"/> | <input type="checkbox"/> | <input type="checkbox"/> |
| 17 | You don't receive conflicting information from your health professionals?                                        | <input type="checkbox"/> | <input type="checkbox"/> | <input type="checkbox"/> | <input type="checkbox"/> |
| 18 | You are informed about what your health professionals discuss with each other regarding your treatment?          | <input type="checkbox"/> | <input type="checkbox"/> | <input type="checkbox"/> | <input type="checkbox"/> |
| 19 | Your physician cooperates when you request a 2 <sup>nd</sup> opinion?                                            | <input type="checkbox"/> | <input type="checkbox"/> | <input type="checkbox"/> | <input type="checkbox"/> |
| 20 | Your primary care physician/ family doctor refer you to the neurologist in a timely manner?                      | <input type="checkbox"/> | <input type="checkbox"/> | <input type="checkbox"/> | <input type="checkbox"/> |
| 21 | Your neurologist and the physician assistant/ nurse practitioner collaborate?                                    | <input type="checkbox"/> | <input type="checkbox"/> | <input type="checkbox"/> | <input type="checkbox"/> |

|    | <b>How important is it that...</b>                                                                        | <b>Not important</b>     | <b>Fairly important</b>  | <b>Important</b>         | <b>Extremely important</b> |
|----|-----------------------------------------------------------------------------------------------------------|--------------------------|--------------------------|--------------------------|----------------------------|
| 22 | If several physicians were involved in your treatment simultaneously, these physicians collaborate?       | <input type="checkbox"/> | <input type="checkbox"/> | <input type="checkbox"/> | <input type="checkbox"/>   |
| 23 | The waiting period before your visit with your health professionals isn't too long?                       | <input type="checkbox"/> | <input type="checkbox"/> | <input type="checkbox"/> | <input type="checkbox"/>   |
| 24 | The time spent in the waiting room isn't too long?                                                        | <input type="checkbox"/> | <input type="checkbox"/> | <input type="checkbox"/> | <input type="checkbox"/>   |
| 25 | You have one person assigned to you, whom you can contact for questions, problems or a complaint?         | <input type="checkbox"/> | <input type="checkbox"/> | <input type="checkbox"/> | <input type="checkbox"/>   |
| 26 | You have e-mail access to your health professionals?                                                      | <input type="checkbox"/> | <input type="checkbox"/> | <input type="checkbox"/> | <input type="checkbox"/>   |
| 27 | You have telephone access to your health professionals?                                                   | <input type="checkbox"/> | <input type="checkbox"/> | <input type="checkbox"/> | <input type="checkbox"/>   |
| 28 | Your health professionals answer your questions in a timely manner?                                       | <input type="checkbox"/> | <input type="checkbox"/> | <input type="checkbox"/> | <input type="checkbox"/>   |
| 29 | Your health professionals listen carefully to you?                                                        | <input type="checkbox"/> | <input type="checkbox"/> | <input type="checkbox"/> | <input type="checkbox"/>   |
| 30 | Your health professionals take enough time with you?                                                      | <input type="checkbox"/> | <input type="checkbox"/> | <input type="checkbox"/> | <input type="checkbox"/>   |
| 31 | Your health professionals explain things clearly?                                                         | <input type="checkbox"/> | <input type="checkbox"/> | <input type="checkbox"/> | <input type="checkbox"/>   |
| 32 | Your health professionals are competent regarding the treatment of Parkinson's disease?                   | <input type="checkbox"/> | <input type="checkbox"/> | <input type="checkbox"/> | <input type="checkbox"/>   |
| 33 | You have access to your own medical record?                                                               | <input type="checkbox"/> | <input type="checkbox"/> | <input type="checkbox"/> | <input type="checkbox"/>   |
| 34 | You have the opportunity to authorize who has access to your medical record?                              | <input type="checkbox"/> | <input type="checkbox"/> | <input type="checkbox"/> | <input type="checkbox"/>   |
| 35 | You have the opportunity to choose the health professionals by whom you wish to be treated?               | <input type="checkbox"/> | <input type="checkbox"/> | <input type="checkbox"/> | <input type="checkbox"/>   |
| 36 | You have the opportunity to schedule appointments with your health professionals at a time you prefer?    | <input type="checkbox"/> | <input type="checkbox"/> | <input type="checkbox"/> | <input type="checkbox"/>   |
| 37 | Your health professionals adapt the treatment to your personal situation and preferences?                 | <input type="checkbox"/> | <input type="checkbox"/> | <input type="checkbox"/> | <input type="checkbox"/>   |
| 38 | You are encouraged to participate in decisions about your treatment with your health professionals?       | <input type="checkbox"/> | <input type="checkbox"/> | <input type="checkbox"/> | <input type="checkbox"/>   |
| 39 | Your health professionals pay attention to your caregiver?                                                | <input type="checkbox"/> | <input type="checkbox"/> | <input type="checkbox"/> | <input type="checkbox"/>   |
| 40 | Your health professionals actively involve your caregiver in decisions about your treatment?              | <input type="checkbox"/> | <input type="checkbox"/> | <input type="checkbox"/> | <input type="checkbox"/>   |
| 41 | Your health professionals support you directly after the diagnosis PD is communicated to you?             | <input type="checkbox"/> | <input type="checkbox"/> | <input type="checkbox"/> | <input type="checkbox"/>   |
| 42 | Your health professionals support you in coping with the consequences of Parkinson's disease?             | <input type="checkbox"/> | <input type="checkbox"/> | <input type="checkbox"/> | <input type="checkbox"/>   |
| 43 | Your health professionals support you when you have to deal with personal relationship changes due to PD? | <input type="checkbox"/> | <input type="checkbox"/> | <input type="checkbox"/> | <input type="checkbox"/>   |
| 44 | Your health professionals support you when you have problems related to your job due to PD?               | <input type="checkbox"/> | <input type="checkbox"/> | <input type="checkbox"/> | <input type="checkbox"/>   |

**Has anyone assisted you with completing this questionnaire?**

*You may mark more than one square*

- No
- Yes, he/she has read the questions aloud
- Yes, he/she has written down my answers
- Yes, he/she has answered the questions on my behalf
- Yes, he/she has translated the questions in my own language

**ROOM FOR ADDITIONAL REMARKS**

You have reached the end of the questionnaire. If you have any remarks or comments about the care you received or about this questionnaire, please write them down below. These data will be processed anonymously.

**THANK YOU VERY MUCH FOR COMPLETING THE QUESTIONNAIRE**
